# Supplementary material
Source: PubMed Central journal article supplement (PMC8775936)
Supplement: NIHMS1765998-supplement-Supplemental_Info.pdf [file NIHMS1765998-supplement-Supplemental_Info.pdf]

Table S1. Median baseline (1989) metabolic, inflammatory and dietary measures in colorectal cancer cases and matched controls (193 pairs) in CLUE II.

|                       | Overall |          |     | Men    |          |      | Women |          |      |
|-----------------------|---------|----------|-----|--------|----------|------|-------|----------|------|
|                       | Cases   | Controls | p*  | Cases  | Controls | p*   | Cases | Controls | p*   |
| CRP (mg/L)            | 2.4     | 1.8      | 0.2 | 2.7    | 1.8      | 0.7  | 2.1   | 1.8      | 0.1  |
| IL-6 (pg/mL)          | 2.3     | 1.8      | 0.2 | 2.6    | 2.2      | 0.9  | 2.1   | 1.6      | 0.01 |
| HbA1c (%)             | 5.6     | 5.5      | 0.4 | 5.6    | 5.5      | 0.9  | 5.7   | 5.5      | 0.1  |
| IGFBP1 (ng/mL)        | 12.4    | 19.5     | 0.4 | 7.8    | 10.6     | 0.9  | 21.3  | 25.7     | 0.2  |
| Insulin (pmol/L)      | 13.8    | 13.5     | 0.7 | 14.7   | 15.6     | 0.6  | 13    | 11.9     | 0.9  |
| TCH (mg/dL)           | 213     | 219      | 0.3 | 199    | 211      | 0.05 | 220   | 228      | 0.7  |
| HDL (mg/dL)           | 43.2    | 43.8     | 0.8 | 39.3   | 35.7     | 0.2  | 46.8  | 47.3     | 0.5  |
| Triglycerides (mg/dL) | 145     | 146      | 0.6 | 149.5  | 161      | 0.5  | 137   | 144      | 0.1  |
| Calcium (mg)**        | 715.3   | 840.8    | 0.4 | 821.3  | 882.6    | 0.2  | 656.7 | 807.9    | 0.9  |
| Folate (µg)**         | 308.4   | 295.7    | 0.5 | 331.5  | 311.7    | 0.4  | 297.4 | 263      | 0.8  |
| Fiber (g)**           | 11      | 12.2     | 0.5 | 11.7   | 12.8     | 0.9  | 10.6  | 12       | 0.5  |
| Saturated fat (g)**   | 23.4    | 23       | 0.6 | 32.1   | 27.1     | 0.3  | 17.5  | 20.1     | 0.1  |
| Calories (kcal)**     | 1571.8  | 1623.1   | 0.3 | 1890.3 | 1803.9   | 0.8  | 1330  | 1415.9   | 0.2  |
| Red meat (g)**        | 69.3    | 67.8     | 0.9 | 114.3  | 83.6     | 0.6  | 59.4  | 50.2     | 0.9  |
| Alcohol (g)**         | 4.7     | 5.9      | 0.6 | 7.2    | 6.3      | 0.8  | 4.7   | 2        | 0.4  |

\*, from generalized linear model; TCH – total cholesterol; HDL – high-density cholesterol; intake of dietary factors was assessed through FFQ that was available for 105 (54%) and 128 (66%) of CRC cases and controls.

Table S2. Age and sex-adjusted Spearman correlation coefficients\* of leptin, adiponectin and sTNFR2 concentrations with adiposity, inflammatory and metabolic markers in 193 controls in CLUE II

|                   | Adiponectin |        |       |      |       |        | Leptin |        |       |        |       |        | sTNFR2 |        |       |        |       |        |
|-------------------|-------------|--------|-------|------|-------|--------|--------|--------|-------|--------|-------|--------|--------|--------|-------|--------|-------|--------|
|                   | All         | p      | Men   | p    | Women | p      | All    | p      | Men   | p      | Women | p      | All    | p      | Men   | p      | Women | p      |
| BMI               | -0.28       | <0.001 | -0.25 | 0.02 | -0.27 | 0.005  | 0.65   | <0.001 | 0.70  | <0.001 | 0.62  | <0.001 | 0.21   | 0.004  | 0.10  | 0.1    | 0.22  | 0.03   |
| Adult weight gain | -0.25       | <0.001 | -0.15 | 0.2  | -0.29 | 0.003  | 0.60   | <0.001 | 0.61  | <0.001 | 0.60  | <0.001 | 0.30   | <0.001 | 0.42  | <0.001 | 0.21  | 0.04   |
| CRP               | -0.23       | 0.004  | -0.14 | 0.2  | -0.31 | 0.004  | 0.29   | <0.001 | 0.23  | 0.1    | 0.39  | <0.001 | 0.29   | <0.001 | 0.37  | 0.002  | 0.26  | 0.02   |
| IL-6              | -0.17       | 0.03   | -0.01 | 0.9  | -0.25 | 0.02   | 0.19   | 0.02   | 0.13  | 0.3    | 0.25  | 0.02   | 0.20   | 0.01   | 0.24  | 0.05   | 0.19  | 0.1    |
| Insulin           | -0.23       | 0.004  | -0.21 | 0.1  | -0.28 | 0.01   | 0.25   | 0.001  | 0.32  | 0.01   | 0.25  | 0.02   | 0.10   | 0.2    | 0.20  | 0.1    | 0.02  | 0.9    |
| IGFBP-1           | 0.31        | <0.001 | 0.26  | 0.03 | 0.34  | 0.001  | -0.41  | <0.001 | -0.44 | <0.001 | -0.37 | <0.001 | -0.11  | 0.2    | -0.03 | 0.8    | -0.16 | 0.1    |
| HbA1c             | -0.08       | 0.3    | 0.04  | 0.8  | -0.07 | 0.5    | 0.02   | 0.8    | 0.17  | 0.2    | -0.07 | 0.5    | 0.02   | 0.8    | -0.04 | 0.8    | 0.07  | 0.5    |
| TCH               | 0.09        | 0.2    | 0.13  | 0.2  | 0.07  | 0.5    | 0.14   | 0.1    | 0.15  | 0.2    | 0.08  | 0.4    | -0.09  | 0.2    | -0.25 | 0.02   | 0.05  | 0.6    |
| HDL               | 0.39        | <0.001 | 0.33  | 0.01 | 0.41  | <0.001 | -0.24  | 0.004  | -0.20 | 0.1    | -0.30 | 0.01   | -0.21  | 0.01   | -0.31 | 0.01   | -0.20 | 0.1    |
| Triglycerides     | -0.23       | 0.004  | -0.28 | 0.02 | -0.19 | 0.1    | 0.27   | 0.001  | 0.34  | 0.004  | 0.25  | 0.02   | 0.17   | 0.04   | 0.17  | 0.2    | 0.18  | 0.1    |
| Leptin            | -0.21       | 0.003  | -0.19 | 0.1  | -0.23 | 0.02   | -      | -      | -     | -      | -     | -      | 0.30   | <0.001 | 0.16  | 0.1    | 0.43  | <0.001 |
| Adiponectin       | -           | -      | -     | -    | -     | -      | -      | -      | -     | -      | -     | -      | 0.01   | 0.9    | -0.09 | 0.4    | 0.06  | 0.5    |

\* , age and sex were adjusted for all participants; age was adjusted for analysis separate in men and women. TCH – total cholesterol; HDL – high-density cholesterol

Table S3. Odds ratio of colorectal cancer in men and women by sex-specific quartiles of concentration of leptin, adiponectin, and sTNFR2 in the CLUE II cohort accounting for BMI, diet, and other risk factors.

|                                  | Case/<br>Control | Model 1 |            | Model 2 |             | Model 3 |            | Model 4 |            | Model 5 |             | Model 6 |            |
|----------------------------------|------------------|---------|------------|---------|-------------|---------|------------|---------|------------|---------|-------------|---------|------------|
|                                  |                  | OR      | 95% CI     | OR      | 95% CI      | OR      | 95% CI     | OR      | 95% CI     | OR      | 95% CI      | OR      | 95% CI     |
| <b>Men</b>                       |                  |         |            |         |             |         |            |         |            |         |             |         |            |
| <b>Adiponectin</b>               |                  |         |            |         |             |         |            |         |            |         |             |         |            |
| 1 <sup>st</sup> Quartile         | 33/22            | 1       | Ref        | 1       | Ref         | 1       | Ref        | 1       | Ref        | 1       | Ref         | 1       | Ref        |
| 2 <sup>nd</sup> Quartile         | 14/22            | 0.46    | 0.19-1.09  | 0.48    | 0.19-1.24   | 0.47    | 0.15-1.48  | 0.49    | 0.19-1.27  | 0.43    | 0.15-1.28   | 0.43    | 0.12-1.62  |
| 3 <sup>rd</sup> Quartile         | 14/24            | 0.45    | 0.19-1.03  | 0.45    | 0.18-1.11   | 0.30    | 0.09-0.99  | 0.50    | 0.20-1.24  | 0.40    | 0.15-1.08   | 0.25    | 0.07-0.96  |
| 4 <sup>th</sup> Quartile         | 28/21            | 0.99    | 0.43-2.29  | 1.15    | 0.45-2.94   | 1.01    | 0.33-3.16  | 0.79    | 0.31-2.01  | 0.72    | 0.25-2.07   | 0.57    | 0.15-2.11  |
| Per 50 <sup>th</sup> percentile* |                  | 0.78    | 0.28-2.21  | 0.97    | 0.31-3.07   | 0.87    | 0.21-3.60  | 0.63    | 0.20-1.99  | 0.55    | 0.15-2.20   | 0.43    | 0.09-2.20  |
| p-trend                          |                  |         | 0.6        |         | 0.9         |         | 0.9        |         | 0.4        |         | 0.4         |         | 0.3        |
| <b>Leptin</b>                    |                  |         |            |         |             |         |            |         |            |         |             |         |            |
| 1 <sup>st</sup> Quartile         | 26/23            | 1       | Ref        | 1       | Ref         | 1       | Ref        | 1       | Ref        | 1       | Ref         | 1       | Ref        |
| 2 <sup>nd</sup> Quartile         | 11/21            | 0.40    | 0.14-1.12  | 0.33    | 0.11-1.02   | 0.37    | 0.10-1.38  | 0.45    | 0.14-1.43  | 0.37    | 0.10-1.33   | 0.39    | 0.08-1.89  |
| 3 <sup>rd</sup> Quartile         | 31/23            | 1.19    | 0.52-2.75  | 0.90    | 0.33-2.45   | 0.71    | 0.20-2.54  | 1.50    | 0.60-3.76  | 1.25    | 0.42-3.76   | 1.09    | 0.26-4.53  |
| 4 <sup>th</sup> Quartile         | 21/22            | 0.81    | 0.34-1.90  | 0.67    | 0.20-2.19   | 0.67    | 0.16-2.80  | 0.88    | 0.34-2.25  | 0.60    | 0.15-2.39   | 0.89    | 0.17-4.69  |
| Per 50 <sup>th</sup> percentile* |                  | 1.18    | 0.25-5.65  | 0.85    | 0.10-7.49   | 0.74    | 0.05-10.64 | 1.48    | 0.26-8.34  | 1.00    | 0.08-11.91  | 1.67    | 0.08-34.74 |
| p-trend                          |                  |         | 0.8        |         | 0.9         |         | 0.8        |         | 0.7        |         | 0.9         |         | 0.7        |
| <b>sTNFR2</b>                    |                  |         |            |         |             |         |            |         |            |         |             |         |            |
| 1 <sup>st</sup> Quartile         | 16/23            | 1       | Ref        | 1       | Ref         | 1       | Ref        | 1       | Ref        | 1       | Ref         | 1       | Ref        |
| 2 <sup>nd</sup> Quartile         | 14/21            | 1.07    | 0.38-3.03  | 1.16    | 0.39-3.43   | 0.70    | 0.19-2.60  | 1.08    | 0.34-3.42  | 1.34    | 0.38-4.74   | 0.74    | 0.16-3.29  |
| 3 <sup>rd</sup> Quartile         | 19/24            | 1.40    | 0.51-3.85  | 1.68    | 0.57-4.88   | 1.03    | 0.29-3.72  | 1.21    | 0.40-3.66  | 1.62    | 0.49-5.34   | 0.95    | 0.22-4.08  |
| 4 <sup>th</sup> Quartile         | 40/21            | 3.06    | 1.19-7.88  | 3.66    | 1.30-10.33  | 2.26    | 0.66-7.77  | 3.14    | 1.11-8.86  | 4.76    | 1.45-15.64  | 2.83    | 0.67-11.93 |
| Per 50 <sup>th</sup> percentile* |                  | 1.37    | 1.08-1.73  | 1.42    | 1.10-1.84   | 1.28    | 0.95-1.73  | 1.38    | 1.07-1.78  | 1.50    | 1.12-2.02   | 1.34    | 0.94-1.91  |
| p-trend                          |                  |         | 0.01       |         | 0.01        |         | 0.1        |         | 0.01       |         | 0.01        |         | 0.1        |
| <b>Women</b>                     |                  |         |            |         |             |         |            |         |            |         |             |         |            |
| <b>Adiponectin</b>               |                  |         |            |         |             |         |            |         |            |         |             |         |            |
| 1 <sup>st</sup> Quartile         | 32/26            | 1       | Ref        | 1       | Ref         | 1       | Ref        | 1       | Ref        | 1       | Ref         | 1       | Ref        |
| 2 <sup>nd</sup> Quartile         | 24/27            | 0.68    | 0.31-1.51  | 0.72    | 0.29-1.77   | 0.74    | 0.29-1.90  | 0.70    | 0.31-1.60  | 0.74    | 0.29-1.89   | 0.81    | 0.30-2.20  |
| 3 <sup>rd</sup> Quartile         | 35/25            | 1.02    | 0.51-2.02  | 0.90    | 0.41-2.01   | 0.98    | 0.42-2.26  | 1.02    | 0.49-2.13  | 0.86    | 0.37-2.01   | 0.98    | 0.41-2.39  |
| 4 <sup>th</sup> Quartile         | 13/26            | 0.34    | 0.13-0.88  | 0.33    | 0.11-1.02   | 0.31    | 0.09-1.00  | 0.34    | 0.12-0.94  | 0.32    | 0.10-1.06   | 0.31    | 0.09-1.11  |
| Per 50 <sup>th</sup> percentile* |                  | 0.14    | 0.01-2.09  | 0.10    | 0.00-2.73   | 0.10    | 0.00-3.17  | 0.14    | 0.01-2.71  | 0.08    | 0.00-2.75   | 0.10    | 0.00-3.96  |
| p-trend                          |                  |         | 0.2        |         | 0.2         |         | 0.2        |         | 0.2        |         | 0.2         |         | 0.3        |
| <b>Leptin</b>                    |                  |         |            |         |             |         |            |         |            |         |             |         |            |
| 1 <sup>st</sup> Quartile         | 22/27            | 1       | Ref        | 1       | Ref         | 1       | Ref        | 1       | Ref        | 1       | Ref         | 1       | Ref        |
| 2 <sup>nd</sup> Quartile         | 29/25            | 1.45    | 0.67-3.14  | 1.17    | 0.49-2.80   | 0.89    | 0.35-2.24  | 1.49    | 0.66-3.36  | 1.30    | 0.53-3.21   | 1.00    | 0.38-2.60  |
| 3 <sup>rd</sup> Quartile         | 31/26            | 1.44    | 0.69-3.02  | 1.18    | 0.47-2.98   | 0.89    | 0.32-2.46  | 1.14    | 0.50-2.59  | 1.05    | 0.39-2.83   | 0.82    | 0.27-2.44  |
| 4 <sup>th</sup> Quartile         | 22/26            | 1.05    | 0.48-2.26  | 0.82    | 0.28-2.42   | 0.52    | 0.15-1.84  | 0.98    | 0.42-2.29  | 0.83    | 0.26-2.59   | 0.55    | 0.15-2.04  |
| Per 50 <sup>th</sup> percentile* |                  | 1.27    | 0.03-54.07 | 0.45    | 0.00-105.79 | 0.06    | 0.00-32.22 | 0.60    | 0.01-40.36 | 0.35    | 0.00-114.76 | 0.05    | 0.00-38.70 |
| p-trend                          |                  |         | 0.9        |         | 0.8         |         | 0.4        |         | 0.8        |         | 0.7         |         | 0.4        |
| <b>sTNFR2</b>                    |                  |         |            |         |             |         |            |         |            |         |             |         |            |
| 1 <sup>st</sup> Quartile         | 24/27            | 1       | Ref        | 1       | Ref         | 1       | Ref        | 1       | Ref        | 1       | Ref         | 1       | Ref        |
| 2 <sup>nd</sup> Quartile         | 26/25            | 1.18    | 0.54-2.57  | 1.50    | 0.62-3.61   | 1.23    | 0.48-3.15  | 1.13    | 0.50-2.56  | 1.47    | 0.60-3.63   | 1.22    | 0.45-3.37  |
| 3 <sup>rd</sup> Quartile         | 29/26            | 1.29    | 0.57-2.97  | 1.35    | 0.50-3.63   | 1.51    | 0.53-4.34  | 1.21    | 0.49-2.96  | 1.34    | 0.48-3.75   | 1.55    | 0.50-4.78  |
| 4 <sup>th</sup> Quartile         | 25/26            | 1.12    | 0.48-2.64  | 1.16    | 0.42-3.19   | 1.04    | 0.34-3.19  | 1.15    | 0.45-2.90  | 1.30    | 0.45-3.72   | 1.31    | 0.39-4.36  |
| Per 50 <sup>th</sup> percentile* |                  | 1.04    | 0.77-1.42  | 1.03    | 0.71-1.49   | 1.03    | 0.69-1.53  | 1.05    | 0.75-1.47  | 1.08    | 0.73-1.58   | 1.12    | 0.73-1.72  |
| p-trend                          |                  |         | 0.8        |         | 0.9         |         | 0.9        |         | 0.8        |         | 0.7         |         | 0.6        |

Model 1 – Matched model (matched for age, race, date of blood draw and time since last meal)

Model 2 – Model 1 plus mutually adjusted for BMI (continuous), smoking (never, current, former), alcohol (continuous), NSAID use, diabetic medication use, hormone use, and CRC family history

Model 3 – Model 2 plus adjusted for intake of calcium (continuous), folate (continuous), fiber (continuous), red meat (continuous), saturated fat (continuous), calories (continuous), and missing diet indicator

Model 4 – Model 1 plus mutually adjusted for leptin, adiponectin, and sTNFR2

Model 5 – Model 4 plus adjusted for BMI (continuous), smoking (never, current, former), alcohol (continuous), NSAID use, diabetic medication use, hormone use, and family history

Model 6 – Model 5 plus adjusted for intake of calcium (continuous), folate (continuous), fiber (continuous), red meat (continuous), saturated fat (continuous), calories (continuous), and missing diet indicator

\*The 25<sup>th</sup> to 75<sup>th</sup> percentile delta is based on the biomarker concentration distribution for men and women combined.

\*\*The 25<sup>th</sup> to 75<sup>th</sup> percentile delta is based on the biomarker concentration distribution separately in men and women.

Table S4. Odds ratio of adenoma in men and women by sex-specific quartiles of concentration of leptin, adiponectin, and sTNFR2 in CLUE II accounting for BMI, diet, and other risk factors.

|                                  | Case/<br>Control | Model 1 |             | Model 2 |            | Model 3 |             | Model 4 |            | Model 5 |             | Model 6 |             |
|----------------------------------|------------------|---------|-------------|---------|------------|---------|-------------|---------|------------|---------|-------------|---------|-------------|
|                                  |                  | OR      | 95% CI      | OR      | 95% CI     | OR      | 95% CI      | OR      | 95% CI     | OR      | 95% CI      | OR      | 95% CI      |
| <b>Men</b>                       |                  |         |             |         |            |         |             |         |            |         |             |         |             |
| <b>Adiponectin</b>               |                  |         |             |         |            |         |             |         |            |         |             |         |             |
| 1 <sup>st</sup> Quartile         | 14/16            | 1       | Ref         | 1       | Ref        | 1       | Ref         | 1       | Ref        | 1       | Ref         | 1       | Ref         |
| 2 <sup>nd</sup> Quartile         | 15/17            | 1.02    | 0.36-2.88   | 1.10    | 0.36-3.41  | 0.74    | 0.18-3.09   | 1.11    | 0.38-3.23  | 1.12    | 0.34-3.62   | 0.78    | 0.18-3.50   |
| 3 <sup>rd</sup> Quartile         | 11/17            | 0.79    | 0.24-2.56   | 0.91    | 0.26-3.21  | 0.86    | 0.19-3.98   | 0.85    | 0.25-2.93  | 0.85    | 0.22-3.28   | 0.98    | 0.18-5.31   |
| 4 <sup>th</sup> Quartile         | 27/17            | 1.96    | 0.66-5.82   | 2.88    | 0.81-10.21 | 2.62    | 0.62-11.12  | 2.39    | 0.75-7.64  | 3.01    | 0.82-11.09  | 2.52    | 0.56-11.40  |
| Per 50 <sup>th</sup> percentile* |                  | 2.36    | 0.65-8.65   | 3.73    | 0.83-16.77 | 4.72    | 0.88-25.17  | 2.78    | 0.71-10.96 | 3.67    | 0.80-16.89  | 4.33    | 0.77-24.25  |
| p-trend                          |                  |         | 0.2         |         | 0.1        |         | 0.1         |         | 0.1        |         | 0.1         |         | 0.1         |
| <b>Leptin</b>                    |                  |         |             |         |            |         |             |         |            |         |             |         |             |
| 1 <sup>st</sup> Quartile         | 12/16            | 1       | Ref         | 1       | Ref        | 1       | Ref         | 1       | Ref        | 1       | Ref         | 1       | Ref         |
| 2 <sup>nd</sup> Quartile         | 16/17            | 1.25    | 0.49-3.22   | 1.16    | 0.41-3.28  | 2.05    | 0.59-7.17   | 1.12    | 0.39-3.18  | 0.88    | 0.27-2.86   | 1.58    | 0.35-7.06   |
| 3 <sup>rd</sup> Quartile         | 23/17            | 1.84    | 0.68-4.97   | 1.95    | 0.60-6.30  | 3.99    | 0.91-17.44  | 2.09    | 0.72-6.05  | 1.70    | 0.48-6.06   | 3.33    | 0.66-16.79  |
| 4 <sup>th</sup> Quartile         | 16/17            | 1.26    | 0.46-3.51   | 1.28    | 0.36-4.53  | 2.51    | 0.50-12.72  | 1.44    | 0.46-4.45  | 1.03    | 0.25-4.23   | 2.04    | 0.33-12.49  |
| Per 50 <sup>th</sup> percentile* |                  | 2.09    | 0.23-18.55  | 1.53    | 0.31-7.63  | 3.12    | 0.42-23.00  | 3.26    | 0.30-35.79 | 1.33    | 0.23-7.66   | 2.64    | 0.31-22.19  |
| p-trend                          |                  |         | 0.5         |         | 0.6        |         | 0.3         |         | 0.3        |         | 0.8         |         | 0.4         |
| <b>sTNFR2</b>                    |                  |         |             |         |            |         |             |         |            |         |             |         |             |
| 1 <sup>st</sup> Quartile         | 16/16            | 1       | Ref         | 1       | Ref        | 1       | Ref         | 1       | Ref        | 1       | Ref         | 1       | Ref         |
| 2 <sup>nd</sup> Quartile         | 18/17            | 0.97    | 0.36-2.64   | 1.09    | 0.39-3.08  | 1.45    | 0.45-4.70   | 0.85    | 0.29-2.46  | 0.99    | 0.32-3.11   | 1.42    | 0.38-5.39   |
| 3 <sup>rd</sup> Quartile         | 21/18            | 1.12    | 0.41-3.07   | 1.27    | 0.45-3.61  | 1.81    | 0.56-5.86   | 0.78    | 0.26-2.40  | 0.89    | 0.28-2.89   | 1.45    | 0.38-5.50   |
| 4 <sup>th</sup> Quartile         | 12/16            | 0.69    | 0.21-2.27   | 0.74    | 0.21-2.57  | 1.02    | 0.26-3.97   | 0.53    | 0.14-1.98  | 0.64    | 0.16-2.48   | 0.90    | 0.20-4.01   |
| Per 50 <sup>th</sup> percentile* |                  | 0.91    | 0.60-1.37   | 0.79    | 0.18-3.44  | 1.09    | 0.22-5.31   | 0.81    | 0.51-1.27  | 0.56    | 0.11-2.86   | 0.81    | 0.14-4.58   |
| p-trend                          |                  |         | 0.6         |         | 0.7        |         | 0.9         |         | 0.9        |         | 0.5         |         | 0.8         |
| <b>Women</b>                     |                  |         |             |         |            |         |             |         |            |         |             |         |             |
| <b>Adiponectin</b>               |                  |         |             |         |            |         |             |         |            |         |             |         |             |
| 1 <sup>st</sup> Quartile         | 14/16            | 1       | Ref         | 1       | Ref        | 1       | Ref         | 1       | Ref        | 1       | Ref         | 1       | Ref         |
| 2 <sup>nd</sup> Quartile         | 15/16            | 1.14    | 0.37-3.50   | 1.33    | 0.40-4.49  | 1.66    | 0.33-8.26   | 1.08    | 0.30-3.81  | 1.15    | 0.29-4.51   | 1.09    | 0.15-8.03   |
| 3 <sup>rd</sup> Quartile         | 24/16            | 1.66    | 0.64-4.30   | 1.77    | 0.60-5.21  | 2.90    | 0.77-10.96  | 1.62    | 0.55-4.77  | 1.56    | 0.46-5.37   | 2.44    | 0.51-11.70  |
| 4 <sup>th</sup> Quartile         | 11/16            | 0.71    | 0.24-2.13   | 0.74    | 0.22-2.55  | 0.65    | 0.14-3.01   | 0.57    | 0.16-1.99  | 0.56    | 0.14-2.25   | 0.40    | 0.06-2.77   |
| Per 50 <sup>th</sup> percentile* |                  | 1.00    | 0.05-22.09  | 0.94    | 0.03-30.45 | 2.00    | 0.03-147.29 | 0.58    | 0.02-18.92 | 0.41    | 0.01-20.25  | 0.95    | 0.01158.27  |
| p-trend                          |                  |         | 0.9         |         | 0.9        |         | 0.8         |         | 0.8        |         | 0.7         |         | 0.9         |
| <b>Leptin</b>                    |                  |         |             |         |            |         |             |         |            |         |             |         |             |
| 1 <sup>st</sup> Quartile         | 20/16            | 1       | Ref         | 1       | Ref        | 1       | Ref         | 1       | Ref        | 1       | Ref         | 1       | Ref         |
| 2 <sup>nd</sup> Quartile         | 12/16            | 0.58    | 0.21-1.62   | 0.44    | 0.13-1.53  | 0.27    | 0.06-1.26   | 0.53    | 0.17-1.69  | 0.34    | 0.09-1.36   | 0.21    | 0.04-1.23   |
| 3 <sup>rd</sup> Quartile         | 18/16            | 0.87    | 0.31-2.40   | 0.76    | 0.22-2.64  | 0.73    | 0.15-3.57   | 0.74    | 0.22-2.48  | 0.59    | 0.13-2.66   | 0.60    | 0.07-5.00   |
| 4 <sup>th</sup> Quartile         | 14/16            | 0.66    | 0.22-1.94   | 0.53    | 0.11-2.50  | 0.41    | 0.06-2.61   | 0.49    | 0.13-1.84  | 0.37    | 0.06-2.36   | 0.27    | 0.02-3.30   |
| Per 50 <sup>th</sup> percentile* |                  | 0.17    | 0.00-130.66 | 0.29    | 0.00-34.35 | 0.26    | 0.00-70.21  | 0.03    | 0.00-89.99 | 0.09    | 0.00-28.17  | 0.06    | 0.00-112.70 |
| p-trend                          |                  |         | 0.6         |         | 0.6        |         | 0.6         |         | 0.4        |         | 0.4         |         | 0.5         |
| <b>sTNFR2</b>                    |                  |         |             |         |            |         |             |         |            |         |             |         |             |
| 1 <sup>st</sup> Quartile         | 13/16            | 1       | Ref         | 1       | Ref        | 1       | Ref         | 1       | Ref        | 1       | Ref         | 1       | Ref         |
| 2 <sup>nd</sup> Quartile         | 17/16            | 1.47    | 0.43-5.04   | 0.72    | 0.17-3.09  | 0.78    | 0.12-5.22   | 1.70    | 0.44-6.57  | 0.75    | 0.15-3.75   | 0.82    | 0.08-8.12   |
| 3 <sup>rd</sup> Quartile         | 15/16            | 1.33    | 0.39-4.55   | 0.78    | 0.19-3.16  | 0.66    | 0.11-3.99   | 1.82    | 0.42-7.88  | 1.05    | 0.20-5.53   | 0.82    | 0.08-9.02   |
| 4 <sup>th</sup> Quartile         | 19/16            | 1.59    | 0.52-4.84   | 1.01    | 0.28-3.61  | 0.97    | 0.22-4.30   | 2.03    | 0.53-7.75  | 1.26    | 0.26-6.09   | 1.03    | 0.15-6.91   |
| Per 50 <sup>th</sup> percentile* |                  | 1.10    | 0.84-1.44   | 1.65    | 0.04-68.80 | 1.16    | 0.02-79.62  | 1.17    | 0.84-1.63  | 3.87    | 0.03-450.26 | 1.39    | 0.00-421.29 |
| p-trend                          |                  |         | 0.5         |         | 0.8        |         | 0.9         |         | 0.9        |         | 0.6         |         | 0.9         |

Model 1 – Matched model (matched for age, race, date of blood draw and time since last meal)

Model 2 – Model 1 plus adjusted for BMI (continuous), smoking (never, current, former), alcohol (continuous), hormone use

Model 3 – Model 2 plus adjusted for intake of calcium (continuous), folate (continuous), fiber (continuous), red meat (continuous), saturated fat (continuous), calories (continuous), and missing diet indicator

Model 4 – Model 1 plus adjusted for leptin, adiponectin, and sTNF-R2

Model 5 – Model 4 plus adjusted for BMI (continuous), smoking (never, current, former), alcohol (continuous), hormone use,

Model 6 – Model 5 plus adjusted for intake of calcium (continuous), folate (continuous), fiber (continuous), red meat (continuous), saturated fat (continuous), calories (continuous), and missing diet indicator

\*The 25<sup>th</sup> to 75<sup>th</sup> percentile delta is based on the biomarker concentration distribution for men and women combined.

\*\*The 25<sup>th</sup> to 75<sup>th</sup> percentile delta is based on the biomarker concentration distribution separately in men and women.
